# Supplementary material for: Boosting solar-thermal-electric conversion of thermoelectrochemical cells by construction of a carboxymethylcellulose-interpenetrated polyacrylamide network
Source: Royal Society of Chemistry journal article supplement (doi:10.1039/d2ta00025c), 2022-01-01
Supplement: d2ta00025c1.pdf [file d2ta00025c1.pdf]

Electronic Supplementary Material (ESI) for Journal of Materials Chemistry A.

**Boosting solar-thermal-electric conversion of  
thermoelectrochemical cells by construction of  
carboxymethylcellulose-interpenetrated polyacrylamide  
network<sup>‡</sup>**

Jingjie Shen,<sup>‡</sup> Yanli Ma,<sup>‡</sup> Chenhui Yang, Shouxin Liu, Jian Li, Zhijun Chen\*, Bing Tian\* and Shujun Li\*

Key Laboratory of Bio-based Material Science and Technology of Ministry of Education,  
Northeast Forestry University, Hexing Road 26, Harbin 150040, P.R. China.

<sup>‡</sup> Jingjie Shen and Yanli Ma have contributed equally to this work.

\*Corresponding author

E-mail: [chenzhijun@nefu.edu.cn](mailto:chenzhijun@nefu.edu.cn) (Z. Chen);

[tianbing@nefu.edu.cn](mailto:tianbing@nefu.edu.cn) (B. Tian);

[lishujun@nefu.edu.cn](mailto:lishujun@nefu.edu.cn) (S. Li).

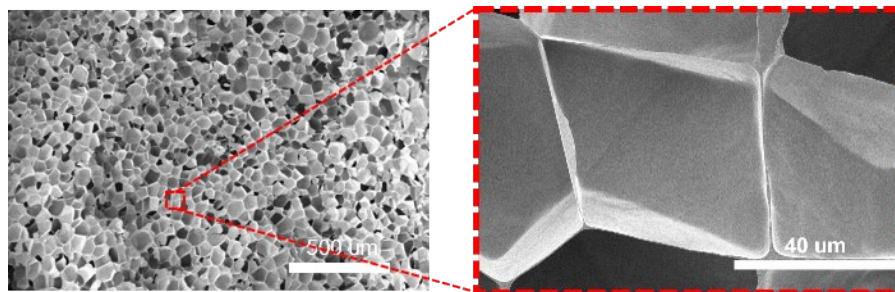

**Fig. S1** SEM images of polyacrylamide network, scale bars = 500 and 40 μm.

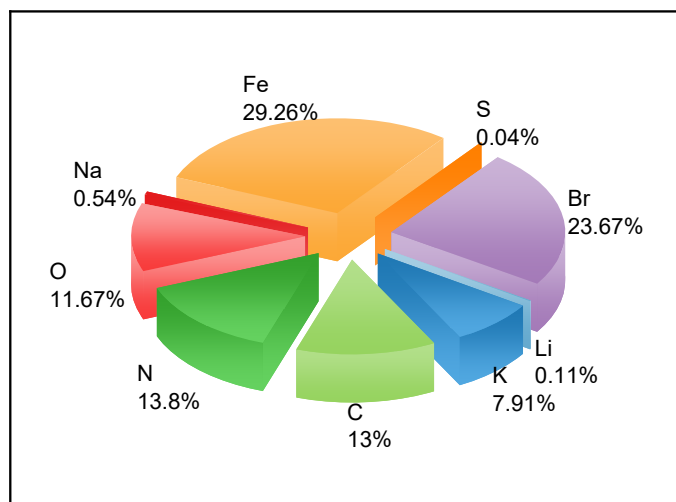

**Fig. S2** SEM-EDS quantitative analyses with Li, K, C, N, O, Na, Fe, S, Br of QS-TEC.

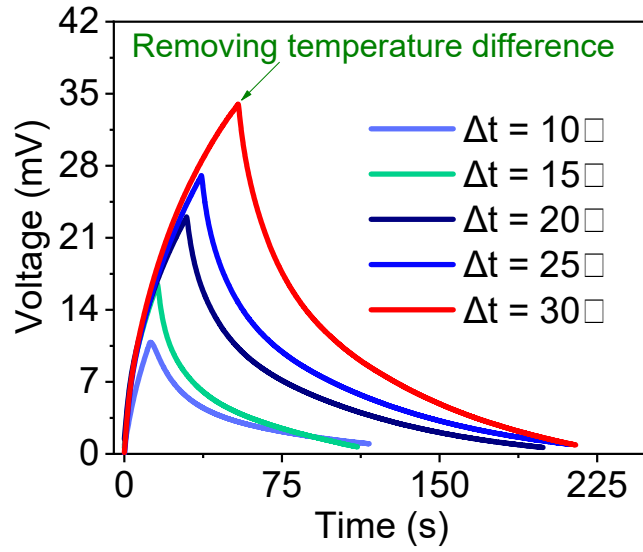

**Fig. S3** Voltages generated by QS-TEC without CMC subjected to various temperature differences and after removal of these temperature differences.

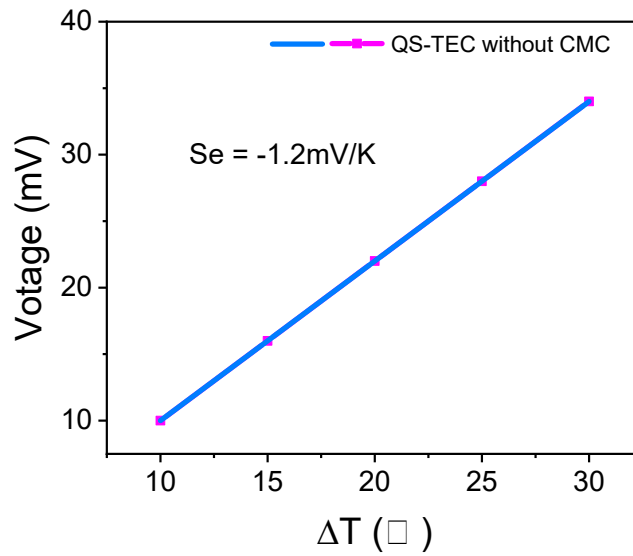

**Fig. S4** Seebeck coefficient of QS-TEC without CMC.

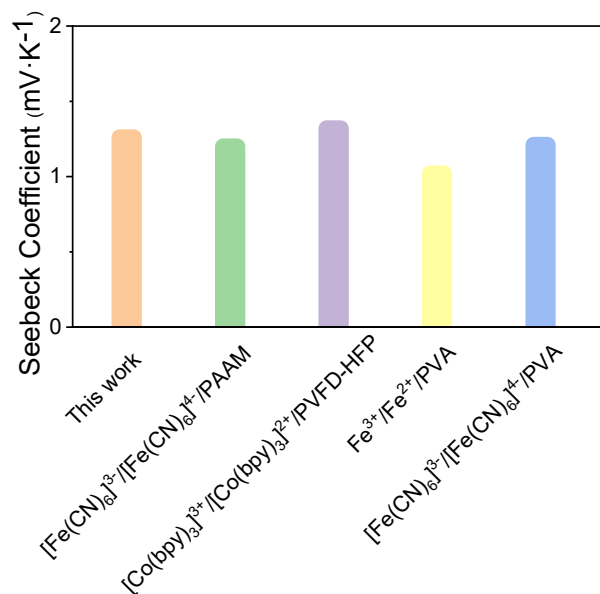

**Fig. S5** Comparison of the QS-TEC with previously-reported thermocells Seebeck coefficient.<sup>1 2 3</sup>

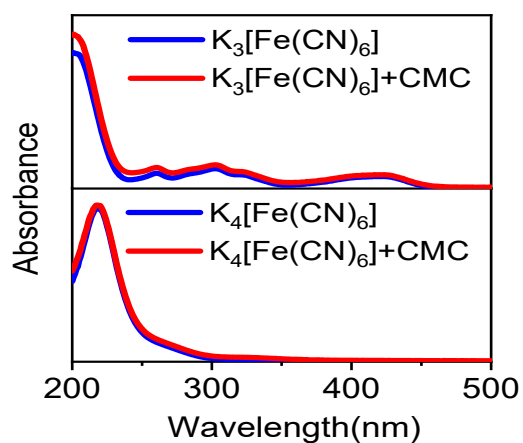

**Fig. S6** UV-Vis spectra of  $\text{Fe}(\text{CN})_6^{4-}/\text{Fe}(\text{CN})_6^{3-}$  in the presence/absence of CMC

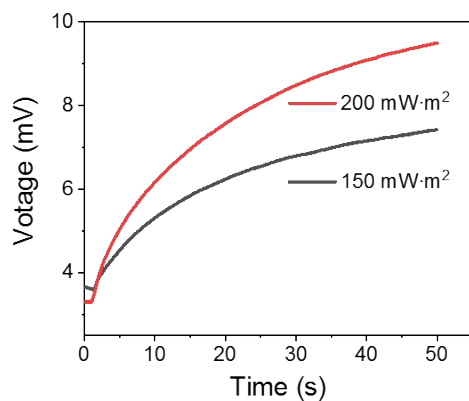

**Fig. S7** Voltage output of solar-driven QS-TEC upon solar irradiation ( $150 \text{ mW cm}^{-2}$  and  $200 \text{ mW cm}^{-2}$ ).

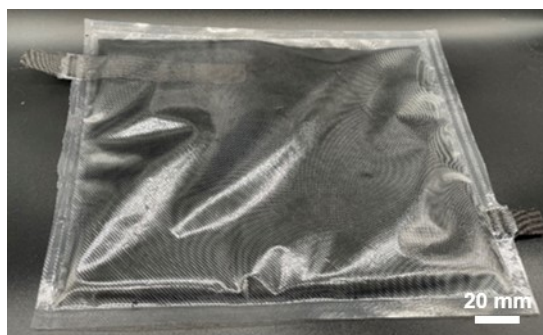

**Fig. S8** Image of large QS-TEC, scale bar = 2 cm.

## References

1. S. R. Pu, Y. T. Liao, K. L. Chen, J. Fu, S. L. Zhang, L. R. Ge, G. Conta, S. Bouzarif, T. Cheng, X. J. Hu, K. Liu and J. Chen, *Nano Lett.*, 2020, **20**, 3791-3797.
2. A. Taheri, D. R. MacFarlane, C. P. Pozo-Gonzalo and J. M. Pringle, *Sustain. Energ. Fuels*, 2018, **2**, 1806-1812.
3. P. H. Yang, K. Liu, Q. Chen, X. B. Mo, Y. S. Zhou, S. Li, G. Feng and J. Zhou, *Angew. Chem.-Int. Edit.*, 2016, **55**, 12050-12053.
