# Supplementary material for: Boosting solar-thermal-electric conversion of thermoelectrochemical cells by construction of a carboxymethylcellulose-interpenetrated polyacrylamide network
Source: Royal Society of Chemistry journal article supplement (doi:10.1039/d2ta00025c), 2022-01-01
Supplement: d2ta00025c2.pdf [file d2ta00025c2.pdf]

## Video abstract

Video S1: solar-driven QS-TEC to motors via a voltage amplifier.

Video S2: solar-driven QS-TEC to LEDs via a voltage amplifier.
